# Supplementary material for: RNA-Seq Reveals that Light and Darkness Are Different Stimuli in Freshwater Heterotrophic Actinobacteria
Source: Front Microbiol. 2021 Nov 1;12:739005. doi: 10.3389/fmicb.2021.739005 (PMC8591293; doi:10.3389/fmicb.2021.739005)
Supplement: Supplementary file 2 [file Table_1.xlsx]

## Sheet: Rhodoluna lacicola
PROJECT INFORMATION
Scientific Program: Microbial
Organism Name: Rhodoluna lacicola MWH-Ta8
Principal Investigator: Julia Maresca
Proposal ID: 503347
Sequencing Project ID: 1167272
Final Deliverable Project ID: 1167268
Proposal Name: Light-induced gene expression in cosmopolitan freshwater Actinobacteria
Sequencing Project Name: Rhodoluna lacicola MWH-Ta8 transcriptomics
Library Name	Sample Name	Sample ID	Sampling Time (Hours through the light/dark cycle)	Sampling Time (Light or Dark)	Sample Information Merged: L/D_timepoint_replicate	Raw Reads	Quality Filtered Reads	Total Fragments	Mapped Fragments	Fragments Assigned	Sequencer Type	Run Type	Included in Analyses
CNCCP	TA2	164192	1	Light	L_t2_1	18305388	13215036	6607518	6593343	4605617	HiSeq-2500	2x151	TRUE
CNCCS	TA3	164193	6	Light	L_t3_1	26766940	25944606	12972303	12951354	9584260	HiSeq-2500	2x151	TRUE
CNCCO	TA1	164191	0.25	Light	L_t1_1	22389602	15095248	7547624	7536952	5061167	HiSeq-2500	2x151	TRUE
CNCCY	TB1	164198	0.25	Light	L_t1_2	26358156	25660486	12830243	12806494	9971779	HiSeq-2500	2x151	TRUE
CNCGZ	TE3	164214	6	Light	L_t3_4	29571520	28570290	14285145	14254501	10844603	HiSeq-2500	2x151	TRUE
CNCGP	TC3	164207	6	Light	L_t3_3	25834684	22888236	11444118	11424570	8431733	HiSeq-2500	2x151	TRUE
CNCGT	TC5	164209	13	Dark	D_t5_3	27266694	26811324	13405662	13379157	9424970	HiSeq-2500	2x151	TRUE
CNCGG	TB6	164203	18	Dark	D_t6_2	34132688	33300442	16650221	16614066	12174032	HiSeq-2500	2x151	TRUE
CNCGN	TC1	164205	0.25	Light	L_t1_3	29222570	28618930	14309465	14286347	10948437	HiSeq-2500	2x151	TRUE
CNCCZ	TB2	164199	1	Light	L_t2_2	27397090	26873462	13436731	13411620	10428197	HiSeq-2500	2x151	TRUE
CNCGB	TB4	164201	12.25	Dark	D_t4_2	26065142	25309850	12654925	12619764	9433435	HiSeq-2500	2x151	TRUE
CNCGW	TE0	164211	-0.083	Dark	D_t0_4	27317786	21751614	10875807	10856481	7702326	HiSeq-2500	2x151	TRUE
CNCGY	TE2	164213	1	Light	L_t2_4	30611354	29172936	14586468	14559591	11156273	HiSeq-2500	2x151	TRUE
CNCCW	TA6	164196	18	Dark	D_t6_1	22480946	22074178	11037089	11012706	7572895	HiSeq-2500	2x151	TRUE
CNCCT	TA4	164194	12.25	Dark	D_t4_1	22029072	17926160	8963080	8944629	6010229	HiSeq-2500	2x151	TRUE
CNCCU	TA5	164195	13	Dark	D_t5_1	31711192	22609548	11304774	11283965	7408740	HiSeq-2500	2x151	TRUE
CNCHA	TE4	164215	12.25	Dark	D_t4_4	27879686	26344776	13172388	13150369	9501977	HiSeq-2500	2x151	TRUE
CNCGA	TB3	164200	6	Light	L_t3_2	22609206	22033054	11016527	10998844	8502997	HiSeq-2500	2x151	TRUE
CNCGO	TC2	164206	1	Light	L_t2_3	26604414	26192760	13096380	13074105	9912435	HiSeq-2500	2x151	TRUE
CNCGH	TC0	164204	-0.083	Dark	D_t0_3	22253810	13713748	6856874	6843932	4488560	HiSeq-2500	2x151	TRUE
CNCGC	TB5	164202	13	Dark	D_t5_2	23923346	23282512	11641256	11622112	8635362	HiSeq-2500	2x151	TRUE
CNCCX	TB0	164197	-0.083	Dark	D_t0_2	28763274	28359188	14179594	14155827	10756517	HiSeq-2500	2x151	TRUE
CNCGX	TE1	164212	0.25	Light	L_t1_4	22070972	21286004	10643002	10626523	8060791	HiSeq-2500	2x151	TRUE
CNCGU	TC6	164210	18	Dark	D_t6_3	18851292	16936264	8468132	8451437	5765649	HiSeq-2500	2x151	TRUE
CNCCN	TA0	164190	-0.083	Dark	D_t0_1	29105796	24837234	12418617	12325541	9094328	HiSeq-2500	2x151	TRUE
CNCGS	TC4	164208	12.25	Dark	D_t4_3	20904052	20108880	10054440	10033420	7201735	HiSeq-2500	2x151	TRUE
CNCHC	TE6	164217	18	Dark	D_t6_4	27718458	24787786	12393893	12368037	8479221	HiSeq-2500	2x151	TRUE
CNCHB	TE5	164216	13	Dark	D_t5_4	20644748	20277952	10138976	10119191	7342560	HiSeq-2500	2x151	TRUE
			*Note that the first time point was taken 5 minutes before the light turned on (-0.083 hours)
